# Supplementary material
Source: PubMed Central journal article supplement (PMC6949400)
Supplement: NIHMS1055235-supplement-1.pdf [file NIHMS1055235-supplement-1.pdf]

**List of Supplemental Digital Content:**

MS 2246 supplemental table.doc

**Supplemental Table 1.** Association (prevalence odds ratio) of carotid-femoral pulse wave velocity (cfPWV) and covariates with central retinal vein equivalent (CRVE) widening (>75th percentile) by diabetes status (p-value for interaction = 0.12) in the Atherosclerosis Risk in Communities study (n=1,657)

Supplemental Table 1. Association (prevalence odds ratio) of carotid-femoral pulse wave velocity (cfPWV) and covariates with central retinal vein equivalent (CRVE) widening (>75th percentile) by diabetes status (p-value for interaction = 0.12) in the Atherosclerosis Risk in Communities study (n=1,657)

| Variable                           | Type 2 diabetes          |                              |                                       |                        |                              |                                       |
|------------------------------------|--------------------------|------------------------------|---------------------------------------|------------------------|------------------------------|---------------------------------------|
|                                    | No, n=1,144              |                              |                                       | Yes, n=513             |                              |                                       |
|                                    | Model 1<br>OR (95% CI)   | Model 1 + HTN<br>OR (95% CI) | Model 1 + HTN<br>+ MAP<br>OR (95% CI) | Model 1<br>OR (95% CI) | Model 1 + HTN<br>OR (95% CI) | Model 1 + HTN<br>+ MAP<br>OR (95% CI) |
| cfPWV, m/s                         | 1.01 (0.96, 1.06)        | 1.01 (0.96, 1.06)            | 1.02 (0.97, 1.08)                     | 1.07 (1.00, 1.14)      | 1.06 (0.99, 1.14)            | <b>1.09 (1.02, 1.17)</b>              |
| Age, years                         | <b>0.96 (0.93, 0.99)</b> | <b>0.96 (0.93, 0.99)</b>     | <b>0.96 (0.93, 0.99)</b>              | 0.99 (0.95, 1.03)      | 0.99 (0.95, 1.03)            | 0.98 (0.94, 1.02)                     |
| Female                             | 1.03 (0.77, 1.40)        | 1.04 (0.77, 1.41)            | 1.04 (0.77, 1.41)                     | 1.15 (0.75, 1.76)      | 1.14 (0.74, 1.74)            | 1.20 (0.78, 1.84)                     |
| Former smoker                      | 1.32 (0.97, 1.79)        | 1.33 (0.98, 1.80)            | 1.31 (0.96, 1.78)                     | 1.24 (0.81, 1.89)      | 1.23 (0.81, 1.89)            | 1.17 (0.76, 1.80)                     |
| Current smoker                     | <b>2.87 (1.60, 5.14)</b> | <b>2.88 (1.61, 5.17)</b>     | <b>2.78 (1.55, 5.01)</b>              | 2.47 (0.88, 6.92)      | 2.40 (0.85, 6.74)            | 2.29 (0.80, 6.56)                     |
| Body mass index, kg/m <sup>2</sup> | 1.02 (0.98, 1.05)        | 1.02 (0.98, 1.05)            | 1.02 (0.98, 1.05)                     | 1.02 (0.97, 1.07)      | 1.02 (0.97, 1.07)            | 1.02 (0.97, 1.07)                     |
| Hypertension                       |                          | 0.89 (0.65, 1.23)            | 0.98 (0.70, 1.36)                     |                        | 1.26 (0.70, 2.26)            | 1.48 (0.81, 2.69)                     |
| Mean arterial pressure, mmHg       |                          |                              | <b>0.99 (0.97, 1.00)</b>              |                        |                              | <b>0.96 (0.94, 0.99)</b>              |

Additionally adjusted for race-center; bold indicates p<0.05; cfPWV: carotid-femoral pulse wave velocity; CI: confidence interval; HTN: hypertension; MAP: mean arterial pressure; OR: odds ratio
